# Supplementary material
Source: publisher site journal article supplement (https://www.dovepress.com/article/437456)
Supplement: Supplementary file 1 [file get_supplementary_file.php]

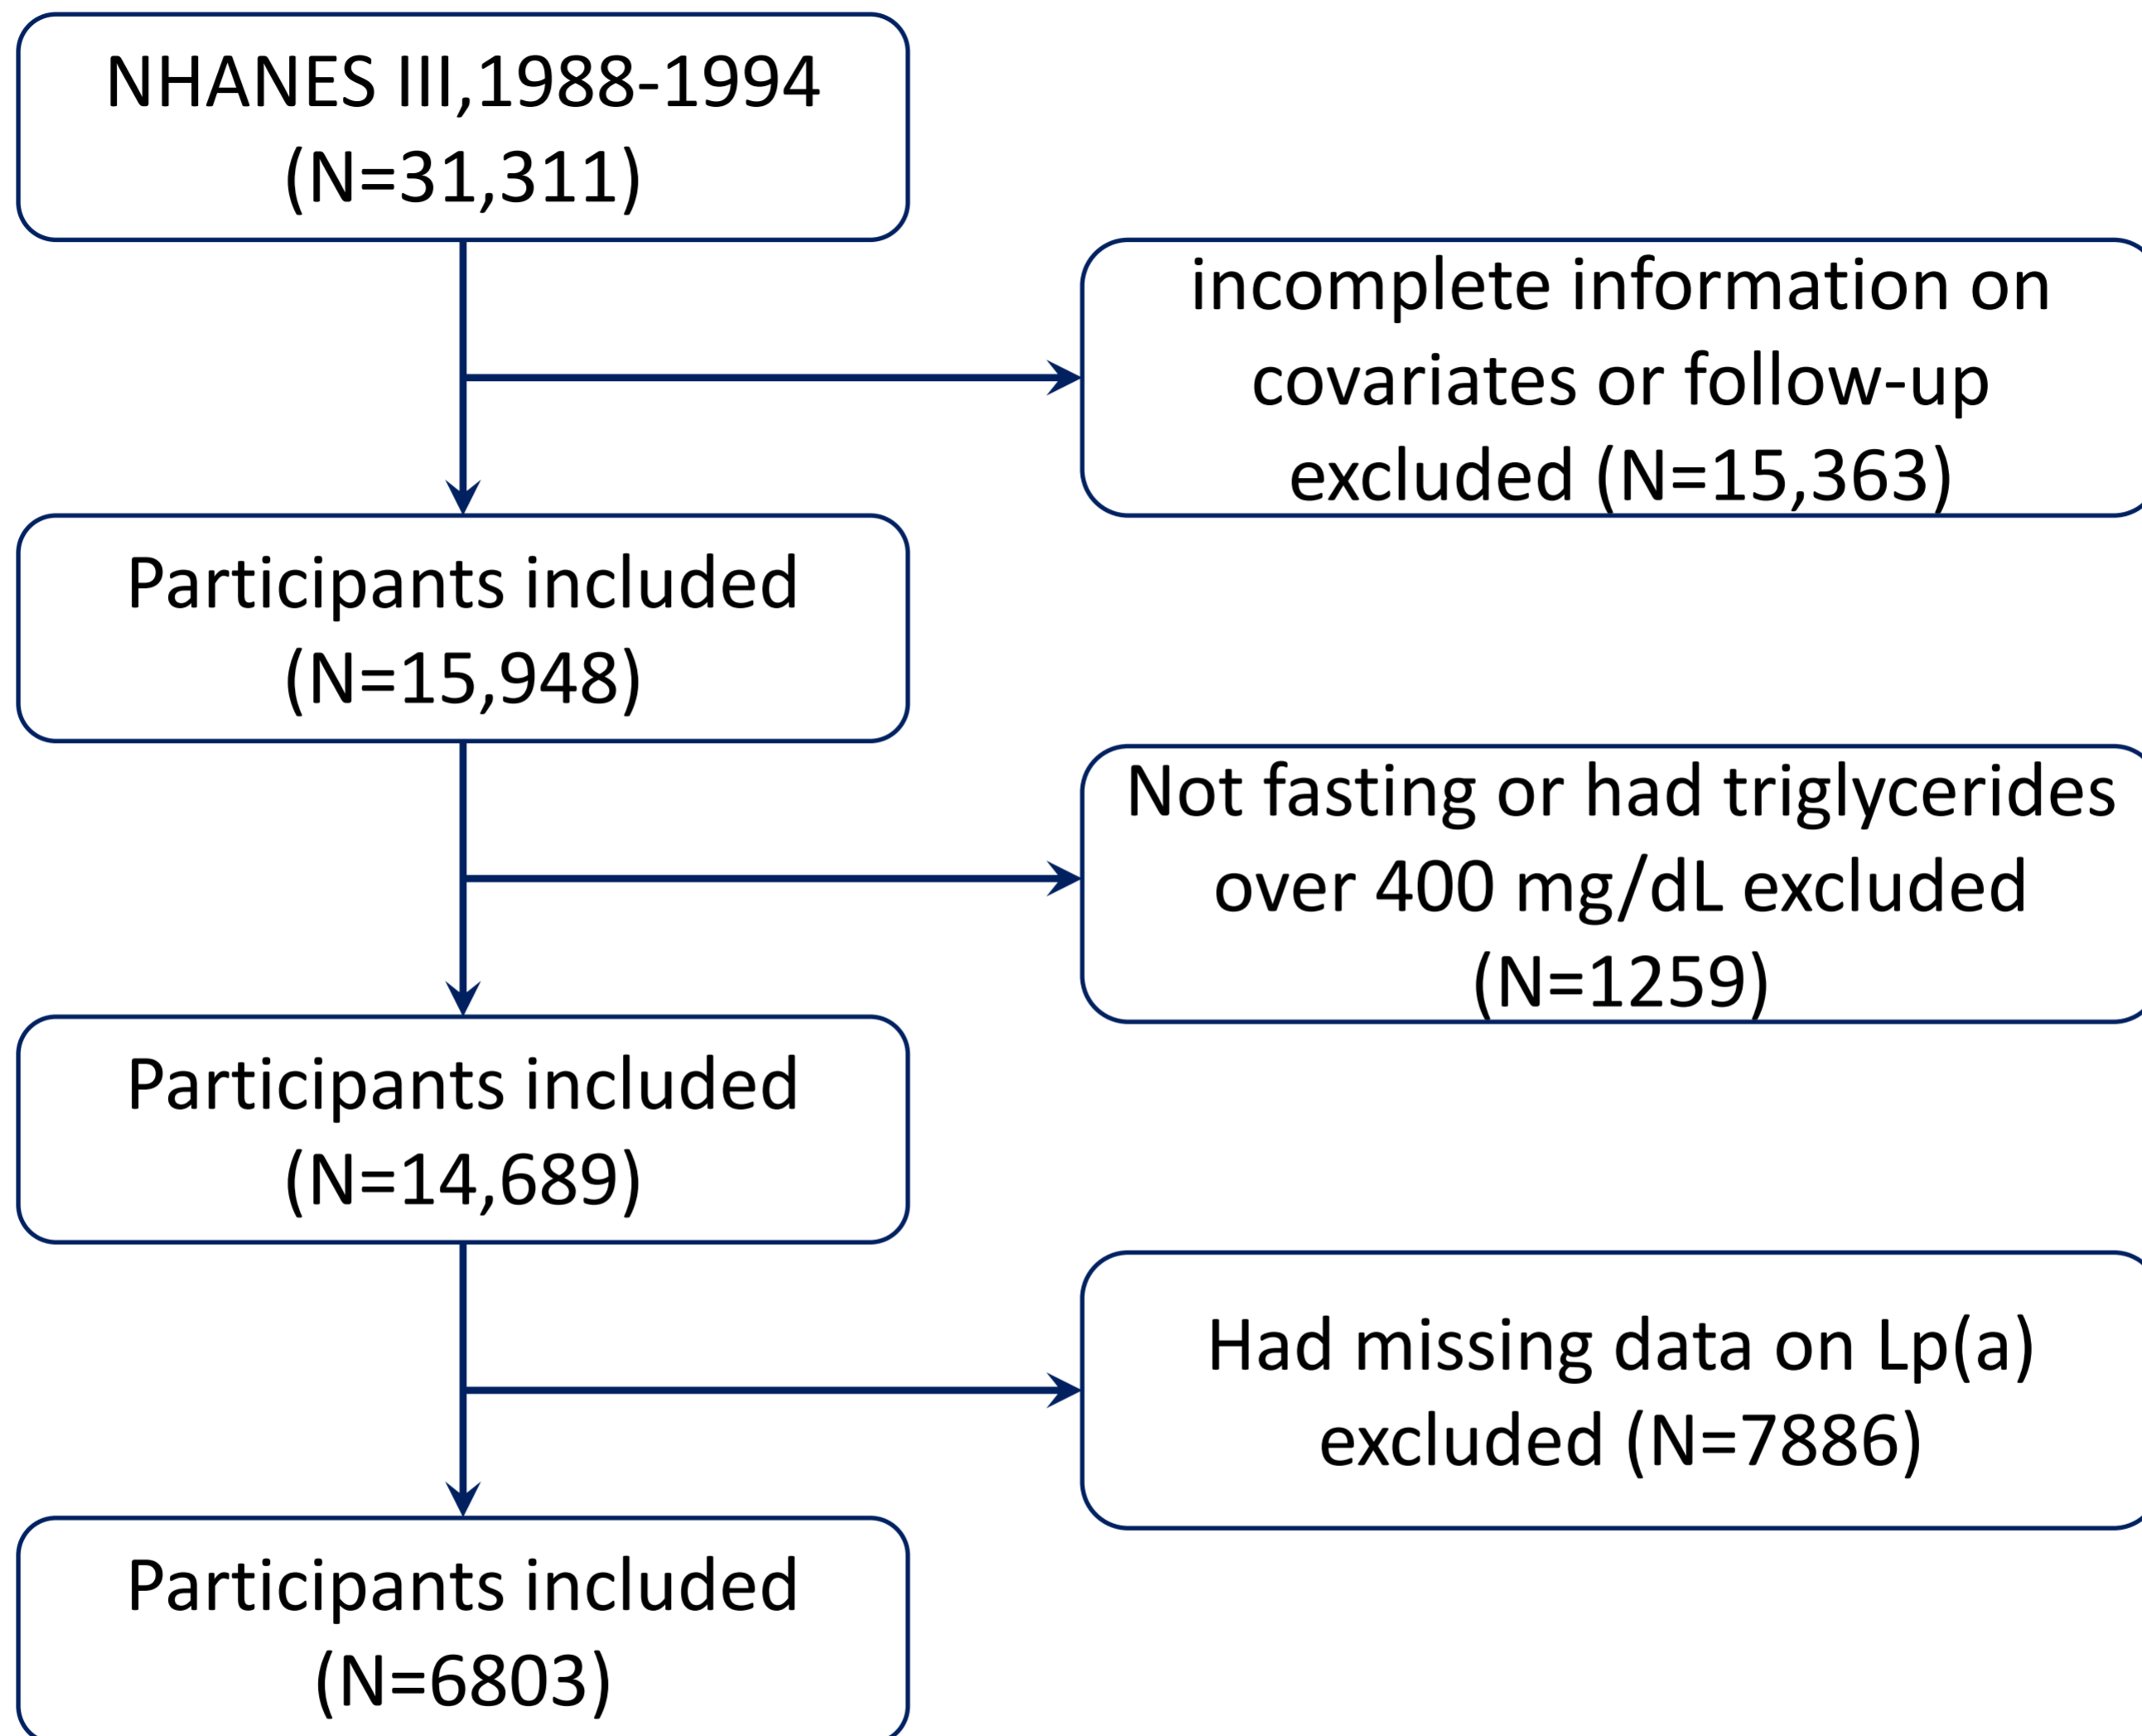

**Supplementary Figure 1:** Participant Inclusion and Exclusion Flow Chart

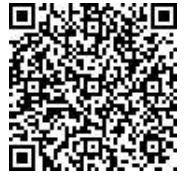

## National Center for Health Statistics

# Public-Use Data Files and Documentation

The National Center for Health Statistics (NCHS) is pleased to offer downloadable public-use data files through the Centers for Disease Control and Prevention's (CDC) FTP file server. Users of this service have access to [data sets](#), [documentation](#), and [questionnaires](#) from NCHS surveys and data collection systems. Downloading instructions are available in "readme" files.

Public-use data files are prepared and disseminated to provide access to the full scope of the data. This allows researchers to manipulate the data in a format appropriate for their analyses. NCHS makes every effort to release data collected through its surveys and data systems in a timely manner.

Users of NCHS public-use data files must comply with [data use restrictions](#) to ensure that the information will be used solely for statistical analysis or reporting purposes.

## Compressed Mortality File

### Longitudinal Studies of Aging (LSOA)

- [Data Files](#)

## National Center for Health Statistics Data Linkage

- [Mortality](#)
- [CMS Medicare Enrollment and Claims Files](#)
- [CMS Medicaid Enrollment and Claims Files](#)
- [United States Renal Data System \(USRDS\)](#)
- [Social Security Administration \(SSA\)](#)
- [Department of Housing and Urban Development \(HUD\)](#)

## National Health and Nutrition Examination Survey (NHANES)

- [Data Sets and Related Documentation](#)

## National Health Care Surveys (NHCS)

- [National Ambulatory Medical Care Survey \(NAMCS\)](#)
- [National Hospital Ambulatory Medical Care Survey \(NHAMCS\)](#)
- [National Hospital Discharge Survey \(NHDS\)](#)
- [National Survey of Ambulatory Surgery \(NSAS\)](#)
- [National Home and Hospice Care Survey \(NHHCS\)](#)
- [National Nursing Home Survey \(NNHS\)](#)
- [National Nursing Assistant Survey \(NNAS\)](#)

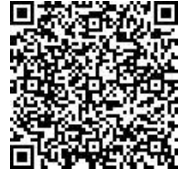

## National Center for Health Statistics

# Data User Agreement

### Warning Data Use Restrictions

#### Please Read Carefully Before Using NCHS Public Use Survey Data

The National Center for Health Statistics (NCHS), Centers for Disease Control and Prevention (CDC), conducts statistical and epidemiological activities under the authority granted by the Public Health Service Act (42 U.S.C. § 242k). NCHS survey data are protected by Federal confidentiality laws including Section 308(d) Public Health Service Act [42 U.S.C. 242m(d)] and the Confidential Information Protection and Statistical Efficiency Act or CIPSEA [Pub. L. No. 115-435, 132 Stat. 5529 § 302]. These confidentiality laws state the data collected by NCHS may be used only for statistical reporting and analysis. Any effort to determine the identity of individuals and establishments violates the assurances of confidentiality provided by federal law.

#### Terms and Conditions

NCHS does all it can to assure that the identity of individuals and establishments cannot be disclosed. All direct identifiers, as well as any characteristics that might lead to identification, are omitted from the dataset. Any intentional identification or disclosure of an individual or establishment violates the assurances of confidentiality given to the providers of the information. Therefore, users will:

1. Use the data in this dataset for statistical reporting and analysis only.
2. Make no attempt to learn the identity of any person or establishment included in these data.
3. Not link this dataset with individually identifiable data from other NCHS or non-NCHS datasets.
4. Not engage in any efforts to assess disclosure methodologies applied to protect individuals and establishments or any research on methods of re-identification of individuals and establishments.

By using these data you signify your agreement to comply with the above-stated statutorily based requirements.

#### Sanctions for Violating NCHS Data Use Agreement

Willfully disclosing any information that could identify a person or establishment in any manner to a person or agency not entitled to receive it, shall be guilty of a class E felony and imprisoned for not more than 5 years, or fined not more than \$250,000, or both.
